# Supplementary material
Source: PubMed Central journal article supplement (PMC8043149)
Supplement: NIHMS1679998-supplement-Tables.pdf [file NIHMS1679998-supplement-Tables.pdf]

**Table 1. Main characteristics of national TB prevalence surveys completed in Africa, 2008-2016**

| Country and year   | Residency criteria                                                                                                                                                                                      | Geographical area excluded <sup>a</sup>                                                    | Number of clusters | Stratified sampling              | Planned sample size | Screening strategy <sup>d</sup>                                                                                                                                                     |                                                                                             | Diagnostic tests  |         |                                                                    | Duration of field operations (months) |
|--------------------|---------------------------------------------------------------------------------------------------------------------------------------------------------------------------------------------------------|--------------------------------------------------------------------------------------------|--------------------|----------------------------------|---------------------|-------------------------------------------------------------------------------------------------------------------------------------------------------------------------------------|---------------------------------------------------------------------------------------------|-------------------|---------|--------------------------------------------------------------------|---------------------------------------|
|                    |                                                                                                                                                                                                         |                                                                                            |                    |                                  |                     | Symptoms interview                                                                                                                                                                  | Chest X-ray                                                                                 | Smear             | Culture | Xpert MTB/RIF                                                      |                                       |
| Ethiopia 2010-2011 | Permanent residents who stayed in the household at least one night during the 14 days prior to the census day. Temporary visitors who stayed in the household at least 14 days prior to the census day. | 37/810 woredas excluded from the sampling frame due to security and logistical challenges. | 85                 | Urban/ Rural/ Pastoralist        | 46,514              | Cough 2 weeks or more                                                                                                                                                               | Lung abnormality <sup>f</sup>                                                               | 2 FM              | 1 LJ    | No                                                                 | 9                                     |
| Gambia 2012        | Residents who spent at least one night in the household in the last 4 weeks before the census. Visitors who arrived in the household 4 weeks or more before the census.                                 | None                                                                                       | 80                 | No                               | 55,281              | 1) Cough 2 weeks or more 2) Any participant with a cough lasting <2 weeks and 2 or more other symptoms 3) Any participant without a cough AND 3 or more other symptoms <sup>g</sup> | Abnormal and suggestive of TB for any abnormality in lung field or mediastinum <sup>f</sup> | 2 FM              | 2 MGIT  | No                                                                 | 14                                    |
| Ghana 2013         | Residents who have not been away for 2 weeks or more.                                                                                                                                                   | None                                                                                       | 98                 | Urban/Rural                      | 64,000              | Cough 2 weeks or more                                                                                                                                                               | Lung abnormality <sup>f</sup>                                                               | 2 ZN <sup>h</sup> | 2 MGIT  | Smear-positive or contaminated cultures                            | 10                                    |
| Kenya 2015-2016    | Residents who lived in the household for a minimum of 30 consecutive days prior to the census.                                                                                                          | One cluster excluded due to security issues                                                | 99 <sup>b</sup>    | Urban/Rural                      | 72,000              | Cough 2 weeks or more                                                                                                                                                               | Lung abnormality <sup>f</sup>                                                               | 2 FM              | 2 LJ    | At least one Xpert test for all participants who screened positive | 12                                    |
| Malawi 2013        | Residents who spent at least 14 days in the household before the census.                                                                                                                                | None                                                                                       | 74                 | Urban/Semi-urban/Rural           | 37,200              | Any symptom for 7 days or longer: cough, cough with sputum, blood stained sputum, chest pain, body weight loss, night sweat, fatigue/malaise, fever, shortness of breath            | Lung abnormality                                                                            | 2 FM <sup>h</sup> | 2 LJ    | Smear-positive or contaminated cultures                            | 11                                    |
| Nigeria 2012       | Slept in the household for 14 days or more.                                                                                                                                                             | Three clusters replaced due to security issues                                             | 70                 | Zonal (6)                        | 49,000              | Cough 2 weeks or more                                                                                                                                                               | Lung abnormality                                                                            | 2 ZN              | 2 LJ    | No                                                                 | 9                                     |
| Rwanda 2012        | Residents who lived in the household for at least 1 month prior to interview.                                                                                                                           | None                                                                                       | 73                 | No                               | 44,500              | Cough (any duration)                                                                                                                                                                | Lung abnormality                                                                            | 2 FM              | 2 LJ    | No                                                                 | 10                                    |
| Sudan 2013-2014    | Household resident or visitor for at least 3 weeks.                                                                                                                                                     | Four clusters were excluded due to security issues                                         | 109 <sup>c</sup>   | Urban/Rural (Nomadic)            | 91,131              | Cough 2 weeks or more; currently on TB treatment                                                                                                                                    | Lung abnormality <sup>f</sup>                                                               | 2 FM              | 2 Ogawa | No                                                                 | 12                                    |
| Tanzania 2012      | A person having slept for the last 2 weeks in the household                                                                                                                                             | None                                                                                       | 62                 | Urban/Rural/ Semi-urban/Zanzibar | 46,792              | Cough 2 weeks or more, haemoptysis, fever for more than 2 weeks, weight loss, and excessive sweating                                                                                | Any abnormality in the lung fields or mediastinum                                           | 3 FM              | 1 LJ    | No (Smear-positive slides examined retrospectively)                | 11                                    |
| Uganda 2014-2015   | Individuals who have resided in the household in the survey cluster for at least 14 days before the census day.                                                                                         | None                                                                                       | 70                 | Urban/Rural                      | 40,180              | Cough 2 weeks or more                                                                                                                                                               | Lung abnormality <sup>f</sup>                                                               | 2 ZN              | 2 LJ    | Smear-positive or contaminated cultures                            | 10                                    |
| Zambia 2013-2014   | Individuals who have slept in the household in the previous 24 hours prior to census.                                                                                                                   | None                                                                                       | 66                 | Urban/Rural                      | 54,400              | Cough or fever or chest pains for 2 weeks or more                                                                                                                                   | Lung abnormality or chest X-ray indeterminate <sup>f</sup>                                  | 2 ZN              | 2 MGIT  | Smear-positive or contaminated cultures                            | 11                                    |
| Zimbabwe 2014      | Permanent residents who had spent a night at the household. Visitors who were residing in the selected cluster for 14 days or more before the survey.                                                   | Two clusters were replaced due to logistical issues.                                       | 75                 | Urban/Rural                      | 44,951              | Cough of any duration, drenching night sweats, and/or haemoptysis                                                                                                                   | Lung abnormality <sup>f</sup>                                                               | 2 FM              | 2 MGIT  | Smear-positive or contaminated cultures                            | 12                                    |

CXR: Chest X-ray. C: Conventional radiology. DR: Digital radiology. FM: Fluorescence microscopy. LJ: Löwenstein-Jensen. MGIT: Mycobacterial growth indicator tube. MOH: Ministry of Health. N/A: Not applicable. NTP: National TB Programme. ZN: Ziehl-Neelsen stain.

<sup>a</sup> Although some surveys excluded certain geographical areas from their sampling frames, we included national surveys when most populations were covered.

<sup>b</sup> In Kenya, 1 cluster was excluded from the original 100.

<sup>c</sup> In Sudan, 5 clusters were excluded from the original 114; one for protocol violation and four for security reasons.

<sup>d</sup> Criteria for eligibility of sputum examination.

<sup>e</sup> In Gambia, other symptoms included chest pain, fever, haemoptysis, night sweats, shortness of breathe, loss appetite and weight loss.

<sup>f</sup> Other criteria were used especially if a participant was exempt or refused to have a chest X-ray. Please see supplementary file (S2 text) for details.

<sup>g</sup> In Ghana, Ziehl-Neelsen smears used the concentrated method.

<sup>h</sup> In Malawi, FM smears used the concentrated method.

**Table 2. Summary of sampling population, survey participants and screening outcomes**

| Country      | Timeframe of field operations | Planned sample size | Number of people eligible to participate | Survey participants |                        | Number and percentage of participants eligible for sputum examination |             |                                             |             |                                        |             |                    |             |                      |             |                          |             |                |            |
|--------------|-------------------------------|---------------------|------------------------------------------|---------------------|------------------------|-----------------------------------------------------------------------|-------------|---------------------------------------------|-------------|----------------------------------------|-------------|--------------------|-------------|----------------------|-------------|--------------------------|-------------|----------------|------------|
|              |                               |                     |                                          | Number              | Participation rate (%) | Symptom positive, chest X-ray positive                                | %           | Symptom positive, chest X-ray negative/ N/A | %           | Symptom negative, chest X-ray positive | %           | Other <sup>a</sup> | %           | Any symptom positive | %           | Any chest X-ray positive | %           | Total eligible | %          |
| Ethiopia     | 2010–2011                     | 46 514              | 51 667                                   | 46 697              | 90%                    | 806                                                                   | 1.7%        | 2220                                        | 4.8%        | 3013                                   | 6.5%        | 41                 | 0.09%       | 3026                 | 6.5%        | 3819                     | 8.2%        | 6080           | 13%        |
| Gambia       | 2011–2013                     | 55 281              | 55 832                                   | 43 100              | 77%                    | 1026                                                                  | 2.4%        | 2436                                        | 5.7%        | 2384                                   | 5.5%        | 102                | 0.24%       | 3462                 | 8.0%        | 3410                     | 7.9%        | 5948           | 14%        |
| Ghana        | 2013                          | 63 905              | 67 757                                   | 61 726              | 91%                    | 771                                                                   | 1.2%        | 1198                                        | 1.9%        | 4387                                   | 7.1%        | 1942               | 3.1%        | 1969                 | 3.2%        | 5158                     | 8.4%        | 8298           | 13%        |
| Kenya        | 2015–2016                     | 72 000              | 76 291                                   | 63 050              | 83%                    | 1241                                                                  | 2.0%        | 2896                                        | 4.6%        | 5184                                   | 8.2%        | 394                | 0.62%       | 4137                 | 6.6%        | 6425                     | 10%         | 9715           | 15%        |
| Malawi       | 2013–2014                     | 37 200              | 39 026                                   | 31 579              | 81%                    | 381                                                                   | 1.2%        | 2334                                        | 7.4%        | 717                                    | 2.3%        | N/A                | N/A         | 2715                 | 8.6%        | 1098                     | 3.5%        | 3432           | 11%        |
| Nigeria      | 2012                          | 49 000              | 77 797                                   | 44 186              | 57%                    | 746                                                                   | 1.7%        | 1720                                        | 3.9%        | 2222                                   | 5.0%        | N/A                | N/A         | 2466                 | 5.6%        | 2968                     | 6.7%        | 4688           | 11%        |
| Rwanda       | 2012                          | 44 500              | 45 058                                   | 43 128              | 96%                    | 545                                                                   | 1.3%        | 2092                                        | 4.9%        | 2107                                   | 4.9%        | 3                  | 0.01%       | 2637                 | 6.1%        | 2652                     | 6.1%        | 4747           | 11%        |
| Sudan        | 2013–2014                     | 91 131              | 96 979                                   | 83 202              | 86%                    | 1823                                                                  | 2.2%        | 840                                         | 1.0%        | 9838                                   | 12%         | 5040               | 6.1%        | 2663                 | 3.2%        | 11 661                   | 14%         | 17 541         | 21%        |
| Uganda       | 2014–2015                     | 40 180              | 45 293                                   | 41 154              | 91%                    | 552                                                                   | 1.3%        | 2162                                        | 5.3%        | 2298                                   | 5.6%        | 130                | 0.32%       | 2714                 | 6.6%        | 2850                     | 6.9%        | 5142           | 12%        |
| Tanzania     | 2011–2012                     | 46 792              | 65 664                                   | 50 447              | 77%                    | 804                                                                   | 1.6%        | 3459                                        | 6.9%        | 2039                                   | 4.0%        | N/A                | N/A         | 4263                 | 8.5%        | 2843                     | 5.6%        | 6302           | 12%        |
| Zambia       | 2013–2014                     | 54 400              | 54 830                                   | 46 099              | 84%                    | 1505                                                                  | 3.3%        | 2948                                        | 6.4%        | 2255                                   | 4.9%        | N/A                | N/A         | 4453                 | 10%         | 3760                     | 8.2%        | 6708           | 15%        |
| Zimbabwe     | 2014                          | 44 951              | 43 478                                   | 33 736              | 78%                    | 628                                                                   | 1.9%        | 1205                                        | 3.6%        | 2803                                   | 8.3%        | 1184               | 3.5%        | 1833                 | 5.4%        | 3431                     | 10%         | 5820           | 17%        |
| <b>Total</b> |                               |                     |                                          |                     | <b>83%</b>             |                                                                       | <b>1.8%</b> |                                             | <b>4.7%</b> |                                        | <b>6.2%</b> |                    | <b>1.7%</b> |                      | <b>6.5%</b> |                          | <b>8.0%</b> |                | <b>14%</b> |

N/A, not applicable.

<sup>a</sup> Other refers to criteria used to ascertain if a participant was eligible for sputum collection other than via symptom or chest X-ray screening. See **S2 Text** for specific details.

**Table 3. Summary of prevalent TB cases and the prevalence of pulmonary TB per 100 000 population aged ≥15 years**

| Country               | Smear-positive pulmonary TB |                                                               |                         |                       | Bacteriologically confirmed pulmonary TB |                                                               |                         |                       | Proportion of bacteriologically confirmed cases that were smear-positive |
|-----------------------|-----------------------------|---------------------------------------------------------------|-------------------------|-----------------------|------------------------------------------|---------------------------------------------------------------|-------------------------|-----------------------|--------------------------------------------------------------------------|
|                       | Number of cases             | Prevalence per 100 000 population aged ≥15 years <sup>a</sup> | 95% confidence interval | <i>k</i> <sup>b</sup> | Number of cases                          | Prevalence per 100 000 population aged ≥15 years <sup>a</sup> | 95% confidence interval | <i>k</i> <sup>b</sup> |                                                                          |
| Ethiopia              | 47                          | 108                                                           | 73–143                  | 0.7                   | 110                                      | 277                                                           | 208–347                 | 0.4                   | 39                                                                       |
| Gambia                | 34                          | 90                                                            | 53–127                  | 1.3                   | 77                                       | 212                                                           | 152–272                 | 0.7                   | 42                                                                       |
| Ghana                 | 64                          | 111                                                           | 76–145                  | 0.9                   | 202                                      | 356                                                           | 288–425                 | 0.7                   | 31                                                                       |
| Kenya                 | 123                         | 230                                                           | 174–286                 | 0.7                   | 305                                      | 558                                                           | 455–662                 | 0.7                   | 41                                                                       |
| Malawi                | 62                          | 220                                                           | 142–297                 | 1.1                   | 132                                      | 452                                                           | 312–593                 | 1.1                   | 49                                                                       |
| Nigeria               | 107                         | 318                                                           | 225–412                 | 0.9                   | 144                                      | 524                                                           | 378–670                 | 0.7                   | 61                                                                       |
| Rwanda                | 27                          | 74                                                            | 48–99                   | N/A <sup>c</sup>      | 40                                       | 119                                                           | 79–160                  | 0.7                   | 62                                                                       |
| Sudan                 | 57                          | 87                                                            | 52–121                  | 1.3                   | 112                                      | 183                                                           | 128–238                 | 1.3                   | 48                                                                       |
| Uganda                | 66                          | 174                                                           | 111–238                 | 0.9                   | 160                                      | 401                                                           | 292–509                 | 0.8                   | 43                                                                       |
| Tanzania <sup>d</sup> | 134                         | 275                                                           | 232–326                 | 0.6                   | N/A                                      | N/A                                                           | N/A                     | N/A                   | N/A                                                                      |
| Zambia                | 135                         | 319                                                           | 232–406                 | 0.8                   | 265                                      | 638                                                           | 502–774                 | 0.7                   | 50                                                                       |
| Zimbabwe              | 23                          | 82                                                            | 47–118                  | N/A <sup>c</sup>      | 107                                      | 344                                                           | 268–420                 | 0.3                   | 24                                                                       |

N/A, not applicable.

<sup>a</sup> Estimates based on the use of robust standard errors with missing value imputation and inverse probability weighting for all countries except for Tanzania for which a cluster-level analytical model was used.

<sup>b</sup> *k* is the coefficient of variation of the cluster-specific TB prevalences. When the coefficient of variation (*k*) of cluster-specific TB prevalence was not reported, it was derived from the reported design effect.

<sup>c</sup> *k* could not be calculated because the design effect was less than one.

<sup>d</sup> The number of bacteriologically-confirmed cases could not be verified for the estimation of prevalence by WHO. The smear-positive and bacteriologically-confirmed prevalence reported by the Tanzanian survey team was 249 per 100 000 (95%CI: 192–305) and 293 per 100 000 (95%CI: 228–358) population, respectively. (Senkoro et al, 2016).

**Table 4. Percentage of survey participants with smear-positive results that were not confirmed TB.** Results shown for surveys in which specimens were tested using smear microscopy, rapid molecular tests and culture.<sup>a</sup>

| Country  | Number of participants with at least one smear positive specimen | Participants with smear-positive specimens excluded as a TB case |      |
|----------|------------------------------------------------------------------|------------------------------------------------------------------|------|
|          |                                                                  | Number                                                           | %    |
| Ghana    | 198                                                              | 138                                                              | 70%  |
| Kenya    | 141                                                              | 18                                                               | 13%  |
| Malawi   | 163                                                              | 101                                                              | 62%  |
| Sudan    | 61                                                               | 4                                                                | 6.6% |
| Uganda   | 91                                                               | 25                                                               | 27%  |
| Zambia   | 356                                                              | 221                                                              | 62%  |
| Zimbabwe | 206                                                              | 183                                                              | 89%  |

<sup>a</sup> Results are shown for surveys in which specimens were systematically tested using smear microscopy and rapid molecular tests. All surveys used Xpert MTB/RIF except Sudan which used line probe assays (LPAs). Kenya used both culture and Xpert MTB/RIF whereas other surveys used Xpert (or LPA) to confirm smear-positive specimens only.

**Table 5. Health care-seeking behaviour among participants who were symptom-screen positive**

| Country               | Participants who were symptom-screen positive | No action taken | %   | Location of care sought    |     |                  |     |                  |      |                |      |          |       |             |       |       |       |             |       |              |       |         |       |
|-----------------------|-----------------------------------------------|-----------------|-----|----------------------------|-----|------------------|-----|------------------|------|----------------|------|----------|-------|-------------|-------|-------|-------|-------------|-------|--------------|-------|---------|-------|
|                       |                                               |                 |     | Consulted medical facility | %   | Type of facility |     |                  |      |                |      | Pharmacy | %     | Traditional | %     | Other | %     | Unspecified | %     | Self-treated | %     | Unknown | %     |
|                       |                                               |                 |     |                            |     | Public facility  | %   | Private facility | %    | Other facility | %    |          |       |             |       |       |       |             |       |              |       |         |       |
| Ethiopia              | 3026                                          | 1932            | 64% | 848                        | 28% | 628              | 74% | 199              | 23%  | 21             | 2.5% | 40       | 1.3%  | 3           | 0.10% | N/A   | N/A   | 55          | 1.8%  | N/A          | N/A   | 148     | 4.8%  |
| Gambia                | 3462                                          | 1424            | 41% | 1706                       | 49% | 1398             | 82% | 220              | 13%  | 88             | 5.2% | 17       | 0.49% | 14          | 0.40% | 24    | 0.69% | N/A         | N/A   | N/A          | N/A   | 277     | 8.0%  |
| Ghana                 | 1969                                          | 264             | 13% | 793                        | 40% | 695              | 88% | 61               | 7.7% | 37             | 4.7% | 324      | 17%   | 20          | 1.0%  | N/A   | N/A   | N/A         | N/A   | 567          | 29%   | 1       | 0.10% |
| Kenya <sup>a</sup>    | 4137                                          | 2763            | 67% | 1257                       | 30% | 1047             | N/A | 198              | N/A  | 3              | N/A  | 56       | N/A   | 9           | N/A   | N/A   | N/A   | N/A         | N/A   | N/A          | N/A   | 117     | 2.8%  |
| Malawi                | 2715                                          | 1096            | 40% | 1280                       | 47% | 901              | 70% | 379              | 30%  | N/A            | N/A  | 32       | 1.2%  | 41          | 1.5%  | 4     | 0.15% | N/A         | N/A   | 236          | 8.7%  | 26      | 0.96% |
| Nigeria               | 2466                                          | 604             | 24% | 800                        | 32% | 628              | 79% | 172              | 21%  | N/A            | N/A  | 319      | 13%   | 11          | 0.45% | 9     | 0.36% | 3           | 0.12% | 680          | 28%   | 40      | 1.6%  |
| Rwanda <sup>a</sup>   | 2855                                          | 1934            | 68% | 921                        | 32% | 941              | N/A | 48               | N/A  | 38             | N/A  | 101      | N/A   | 54          | N/A   | N/A   | N/A   | N/A         | N/A   | 0            | 0     | N/A     | N/A   |
| Sudan                 | 2663                                          | 575             | 22% | 1308                       | 49% | 1077             | 82% | 90               | 6.9% | 141            | 11%  | 52       | 2.0%  | 49          | 1.8%  | N/A   | N/A   | 69          | 2.6%  | N/A          | N/A   | 610     | 23%   |
| Uganda                | 2714                                          | 1059            | 39% | 1201                       | 44% | 1038             | 86% | 146              | 12%  | 17             | 1.4% | 421      | 16%   | 11          | 0.41% | N/A   | N/A   | N/A         | N/A   | 22           | 0.81% | 0       | 0%    |
| Tanzania              | 3388                                          | 1688            | 50% | 481                        | 14% | 445              | 93% | 36               | 7.5% | N/A            | N/A  | 147      | 4.3%  | 11          | 0.32% | 257   | 7.6%  | 155         | 4.6%  | N/A          | N/A   | 649     | 19%   |
| Zambia                | 4453                                          | 2534            | 57% | 1829                       | 41% | 1680             | 92% | 75               | 4.1% | 74             | 4.0% | 16       | 0.36% | 1           | 0.02% | N/A   | N/A   | N/A         | N/A   | N/A          | N/A   | 73      | 1.6%  |
| Zimbabwe <sup>a</sup> | 1833                                          | 1130            | 62% | 486                        | 26% | 438              | N/A | 45               | N/A  | N/A            | N/A  | 17       | N/A   | 13          | N/A   | N/A   | N/A   | N/A         | N/A   | N/A          | N/A   | 217     | 12%   |

N/A, not applicable.

<sup>a</sup> In Kenya, Rwanda and Zimbabwe participants could select more than one category.

**Table S1: risk of bias<sup>1</sup> as assessed by author (IL)**

|    |                                                                                                                                                            | Ethiopia                                                                                       | Gambia | Ghana | Kenya | Malawi | Nigeria | Rwanda | Sudan | Tanzania | Uganda | Zambia | Zimbabwe | Comments                                                                                                                                                                                                                                                                                                         |
|----|------------------------------------------------------------------------------------------------------------------------------------------------------------|------------------------------------------------------------------------------------------------|--------|-------|-------|--------|---------|--------|-------|----------|--------|--------|----------|------------------------------------------------------------------------------------------------------------------------------------------------------------------------------------------------------------------------------------------------------------------------------------------------------------------|
| 1  | Was the study's target population a close representation of the national population in relation to relevant variables, e.g. age, sex, occupation?          | Yes                                                                                            | Yes    | Yes   | Yes   | Yes    | Yes     | Yes    | Yes   | Yes      | Yes    | Yes    | Yes      | The survey census was similar in proportion to the national population with respect to age and sex of those 15 years and above.                                                                                                                                                                                  |
| 2  | Was the sampling frame a true or close representation of the target population?                                                                            | Yes                                                                                            | Yes    | Yes   | Yes   | Yes    | Yes     | Yes    | Yes   | Yes      | Yes    | Yes    | Yes      | Ethiopia, Kenya, Nigeria and Sudan had to exclude a few areas or clusters due to security issues, but the sampling frame was still deemed to be representative of the target population.                                                                                                                         |
| 3  | Was some form of random selection used to select the sample, or, was a census undertaken?                                                                  | Yes                                                                                            | Yes    | Yes   | Yes   | Yes    | Yes     | Yes    | Yes   | Yes      | Yes    | Yes    | Yes      | A census was undertaken at each cluster site for each survey.                                                                                                                                                                                                                                                    |
| 4  | Was the likelihood of non-response bias minimal?                                                                                                           | Yes                                                                                            | Yes    | Yes   | Yes   | Yes    | No      | Yes    | Yes   | Yes      | Yes    | Yes    | Yes      | Nigeria's participation rate was only 57%. As with all surveys, multiple imputation methods accounted for missingness in order to estimate prevalence.                                                                                                                                                           |
| 5  | Were data collected directly from the subjects (as opposed to a proxy)?                                                                                    | Yes                                                                                            | Yes    | Yes   | Yes   | Yes    | Yes     | Yes    | Yes   | Yes      | Yes    | Yes    | Yes      | Data were directly collected from all participants who consented to participate.                                                                                                                                                                                                                                 |
| 6  | Was an acceptable case definition used in the study?                                                                                                       | Yes                                                                                            | Yes    | Yes   | Yes   | Yes    | Yes     | Yes    | Yes   | No       | Yes    | Yes    | Yes      | The original case definition of a survey TB case used bacteriological confirmation methods that could not be verified. Therefore for this paper, an amended case definition using smear-positive TB results was used instead. See methods.                                                                       |
| 7  | Was the study instrument that measured the parameter of interest (e.g. prevalence of low back pain) shown to have reliability and validity (if necessary)? | Yes                                                                                            | Yes    | Yes   | Yes   | Yes    | Yes     | Yes    | Yes   | Yes      | Yes    | Yes    | Yes      | All surveys underwent extensive interviewer testing and also pilot testing prior to field operations. Tools were in accordance with WHO guidance (WHO TB prevalence survey handbook, 2011) i.e. screening via interview and chest X-ray, followed by laboratory test confirmed for those that screened positive. |
| 8  | Was the same mode of data collection used for all subjects?                                                                                                | Yes                                                                                            | Yes    | Yes   | Yes   | Yes    | Yes     | Yes    | Yes   | Yes      | Yes    | Yes    | Yes      | All surveys undertook the same method as per WHO guidance (WHO TB prevalence survey handbook, 2011) i.e. screening via interview and chest X-ray, followed by laboratory test confirmed for those that screened positive.                                                                                        |
| 9  | Was the length of the shortest prevalence period for the parameter of interest appropriate?                                                                | Yes                                                                                            | Yes    | Yes   | Yes   | Yes    | Yes     | Yes    | Yes   | Yes      | Yes    | Yes    | Yes      | All surveys asked about symptoms and their duration within the past 2-3 weeks. Chest X-ray was undertaken at the time of screening.                                                                                                                                                                              |
| 10 | Were the numerator(s) and denominator(s) for the parameter of interest appropriate?                                                                        | Yes                                                                                            | Yes    | Yes   | Yes   | Yes    | Yes     | Yes    | Yes   | Yes      | Yes    | Yes    | Yes      | Extensive verification of all numerators (cases) and denominators was made during the survey. Missing data were imputed during the analytical phase.                                                                                                                                                             |
| 11 | Summary item on the overall risk of bias                                                                                                                   | Low risk of bias - further research is very unlikely to change our confidence in the estimate. |        |       |       |        |         |        |       |          |        |        |          |                                                                                                                                                                                                                                                                                                                  |

<sup>1</sup> Source: Appendix 1 from Hoy D, Brooks P, Woolf A, et al. Assessing risk of bias in prevalence studies: modification of an existing tool and evidence of interrater agreement. J Clin Epidemiol. 2012;65(9):934-939. doi:10.1016/j.jclinepi.2011.11.014

**Table S2. Bacteriologically-confirmed TB survey cases by age group in national TB prevalence surveys implemented in Africa 2008–2016: prevalence and number**

**Prevalence per 100 000 population**

| Country               | Age group (years) |       |       |       |       |      |
|-----------------------|-------------------|-------|-------|-------|-------|------|
|                       | 15-24             | 25-34 | 35-44 | 45-54 | 55-64 | ≥65  |
| Ethiopia              | 292               | 216   | 259   | 337   | 367   | 227  |
| Gambia <sup>a</sup>   | 133               | n/a   | 355   | n/a   | 329   | n/a  |
| Ghana                 | 185               | 228   | 295   | 470   | 607   | 908  |
| Kenya                 | 360               | 716   | 602   | 607   | 587   | 576  |
| Malawi                | 120               | 315   | 902   | 309   | 800   | 1564 |
| Nigeria               | 274               | 496   | 613   | 750   | 599   | 660  |
| Rwanda <sup>a</sup>   | 86                | n/a   | 114   | n/a   | 262   | n/a  |
| Sudan                 | 50                | 239   | 253   | 226   | 252   | 280  |
| Tanzania <sup>b</sup> | 51                | 280   | 316   | 241   | 462   | 662  |
| Uganda                | 228               | 442   | 624   | 565   | 636   | 570  |
| Zambia                | 285               | 664   | 947   | 926   | 708   | 876  |
| Zimbabwe              | 129               | 373   | 546   | 310   | 490   | 547  |

**Number of TB cases**

| Country               | Age group (years) |       |       |       |       |     | Total TB cases |
|-----------------------|-------------------|-------|-------|-------|-------|-----|----------------|
|                       | 15-24             | 25-34 | 35-44 | 45-54 | 55-64 | ≥65 |                |
| Ethiopia              | 36                | 24    | 18    | 16    | 11    | 5   | 110            |
| Gambia                | 15                | 14    | 19    | 11    | 8     | 10  | 77             |
| Ghana                 | 29                | 29    | 30    | 37    | 30    | 47  | 202            |
| Kenya                 | 54                | 90    | 58    | 43    | 28    | 32  | 305            |
| Malawi                | 12                | 21    | 35    | 10    | 17    | 37  | 132            |
| Nigeria               | 19                | 35    | 30    | 29    | 15    | 16  | 144            |
| Rwanda                | 8                 | 7     | 7     | 5     | 9     | 4   | 40             |
| Sudan                 | 8                 | 32    | 28    | 17    | 13    | 14  | 112            |
| Tanzania <sup>b</sup> | 7                 | 29    | 28    | 16    | 21    | 33  | 134            |
| Uganda                | 29                | 42    | 39    | 24    | 12    | 14  | 160            |
| Zambia                | 32                | 66    | 68    | 45    | 23    | 31  | 265            |
| Zimbabwe              | 11                | 28    | 30    | 10    | 13    | 15  | 107            |

<sup>a</sup> For Gambia and Rwanda, rates were only calculated for three age groups: 15-34, 35-54 and ≥55 years.

<sup>b</sup> Bacteriologically-confirmed TB cases could not be verified, therefore only smear-positive TB cases were included in the analysis.

**Table S3. Prevalent TB cases by screening outcome in national TB prevalence surveys implemented in Africa 2008–2016**

| Country  | Number (%) of prevalent TB cases by screening outcome |      |            |      |                    |      |                    |      |       |
|----------|-------------------------------------------------------|------|------------|------|--------------------|------|--------------------|------|-------|
|          | Symptoms only                                         | %    | X-ray only | %    | Symptoms and X-ray | %    | Other <sup>a</sup> | %    | Total |
| Ethiopia | 12                                                    | 10.9 | 53         | 48.2 | 45                 | 40.9 | 0                  | 0    | 110   |
| Gambia   | 12                                                    | 15.6 | 33         | 42.9 | 32                 | 41.6 | 0                  | 0    | 77    |
| Ghana    | 15                                                    | 7.4  | 85         | 42.1 | 67                 | 33.2 | 35                 | 17.3 | 202   |
| Kenya    | 32                                                    | 10.5 | 154        | 50.5 | 115                | 37.7 | 4                  | 1.3  | 305   |
| Malawi   | 67                                                    | 50.8 | 40         | 30.3 | 25                 | 18.9 | N/A                | N/A  | 132   |
| Nigeria  | 16                                                    | 11.1 | 52         | 36.1 | 76                 | 52.8 | N/A                | N/A  | 144   |
| Rwanda   | 4                                                     | 10.0 | 21         | 52.5 | 15                 | 37.5 | 0                  | 0.0  | 40    |
| Sudan    | 8                                                     | 7.1  | 45         | 40.2 | 43                 | 38.4 | 16                 | 14.3 | 112   |
| Tanzania | 18                                                    | 13.4 | 48         | 35.8 | 55                 | 41.0 | 13                 | 9.7  | 134   |
| Uganda   | 16                                                    | 10.0 | 81         | 50.6 | 63                 | 39.4 | 0                  | 0    | 160   |
| Zambia   | 46                                                    | 17.4 | 104        | 39.2 | 115                | 43.4 | N/A                | N/A  | 265   |
| Zimbabwe | 10                                                    | 9.3  | 64         | 59.8 | 29                 | 27.1 | 4                  | 3.7  | 107   |

<sup>a</sup> Other refers to criteria used to ascertain if a participant was eligible for sputum collection other than via symptom or chest X-ray screening. See supplementary file ([Text S2](#)) for specific details. In Tanzania, 13 people screened negative, and were not part of the total number eligible for sputum examination. The reason for their sputum submission was not known.



**Table S4. Location of treatment for participants who were on treatment at the time the survey was implemented, 2008–2016**

| Country             | Number of participants who were on TB treatment at the time of the survey | Public sector | %    | Private sector | %    | Other sector | %    | Unknown sector | %    |
|---------------------|---------------------------------------------------------------------------|---------------|------|----------------|------|--------------|------|----------------|------|
| Ethiopia            | 75                                                                        | 54            | 72%  | 7              | 9.3% | 3            | 4.0% | 11             | 15%  |
| Gambia              | 38                                                                        | 38            | 100% | 0              | 0%   | 0            | 0%   | 0              | 0%   |
| Ghana               | 48                                                                        | 42            | 88%  | 1              | 2.1% | 5            | 10%  | 0              | 0%   |
| Kenya <sup>a</sup>  | 62                                                                        | 23            | 37%  | 0              | 0%   | 1            | 1.6% | 38             | 61%  |
| Malawi <sup>a</sup> | 12                                                                        | 10            | 83%  | 2              | 17%  | 0            | 0%   | 0              | 0%   |
| Nigeria             | 82                                                                        | 56            | 68%  | 14             | 17%  | 5            | 6.1% | 7              | 8.5% |
| Sudan               | 104                                                                       | 69            | 66%  | 1              | 1.0% | 4            | 3.8% | 30             | 29%  |
| Uganda              | 61                                                                        | 57            | 93%  | 4              | 6.6% | 0            | 0%   | 0              | 0%   |
| Zambia              | 114                                                                       | 61            | 54%  | 1              | 0.9% | 0            | 0%   | 52             | 46%  |

<sup>a</sup> In Kenya and Malawi, data were available only for participants who were eligible for sputum submission.

**Table S5. Major successes of national TB prevalence surveys implemented in Africa 2008–2016**

| Country  | First national survey completed (ever or for many years) <sup>a</sup> | Up-to-date direct measurement of TB disease burden and other valuable information about the status of the TB epidemic and access to care provided | High participation rate (>80%) | Good data management | Strong laboratory | Timely finalization and dissemination of results |
|----------|-----------------------------------------------------------------------|---------------------------------------------------------------------------------------------------------------------------------------------------|--------------------------------|----------------------|-------------------|--------------------------------------------------|
| Ethiopia | x                                                                     | x                                                                                                                                                 | x                              |                      |                   |                                                  |
| Gambia   | x                                                                     | x                                                                                                                                                 |                                |                      | x                 |                                                  |
| Ghana    | x                                                                     | x                                                                                                                                                 | x                              | x                    |                   |                                                  |
| Kenya    | x                                                                     | x                                                                                                                                                 | x                              |                      |                   |                                                  |
| Malawi   | x                                                                     | x                                                                                                                                                 | x                              | x                    |                   | x                                                |
| Nigeria  | x                                                                     | x                                                                                                                                                 |                                |                      |                   |                                                  |
| Rwanda   | x                                                                     | x                                                                                                                                                 | x                              |                      |                   |                                                  |
| Sudan    | x                                                                     | x                                                                                                                                                 | x                              |                      |                   |                                                  |
| Uganda   | x                                                                     | x                                                                                                                                                 | x                              | x                    | x                 | x                                                |
| Tanzania | x                                                                     | x                                                                                                                                                 |                                |                      |                   |                                                  |
| Zambia   | x                                                                     | x                                                                                                                                                 | x                              | x                    |                   | x                                                |
| Zimbabwe | x                                                                     | x                                                                                                                                                 |                                |                      | x                 | x                                                |

**Table S6. Major challenges faced in national TB prevalence surveys implemented in Africa 2008–2016**

| Country  | Time to secure funding or funding interruptions during survey | Lengthy process to procure X-ray equipment | Security issues | Participation rate ( $\leq 80\%$ ) <sup>a</sup> | Overheating or breakdown of X-ray machines during field operations | Data management | Laboratory work (primarily issues related to culture testing) | Delays in central reading of X-rays or difficulties in retaining radiologists | Delays in writing the survey report |
|----------|---------------------------------------------------------------|--------------------------------------------|-----------------|-------------------------------------------------|--------------------------------------------------------------------|-----------------|---------------------------------------------------------------|-------------------------------------------------------------------------------|-------------------------------------|
| Ethiopia |                                                               | x                                          |                 |                                                 |                                                                    | x               | x                                                             | x                                                                             |                                     |
| Gambia   |                                                               | x                                          |                 | x                                               |                                                                    |                 |                                                               |                                                                               | x                                   |
| Ghana    |                                                               | x                                          |                 |                                                 | x                                                                  |                 | x                                                             | x                                                                             | x                                   |
| Kenya    |                                                               | x                                          |                 |                                                 |                                                                    | x               |                                                               | x                                                                             |                                     |
| Malawi   | x                                                             |                                            |                 |                                                 | x                                                                  |                 | x                                                             | x                                                                             | x                                   |
| Nigeria  |                                                               |                                            | x               | x                                               |                                                                    | x               | x                                                             |                                                                               | x                                   |
| Rwanda   |                                                               | x                                          |                 |                                                 |                                                                    | x               | x                                                             |                                                                               |                                     |
| Sudan    |                                                               |                                            | x               |                                                 | x                                                                  | x               | x                                                             |                                                                               |                                     |
| Uganda   | x                                                             |                                            |                 |                                                 | x                                                                  |                 |                                                               |                                                                               |                                     |
| Tanzania | x                                                             |                                            |                 |                                                 |                                                                    | x               | x                                                             |                                                                               | x                                   |
| Zambia   |                                                               |                                            |                 |                                                 |                                                                    |                 |                                                               |                                                                               |                                     |
| Zimbabwe |                                                               |                                            |                 |                                                 | x                                                                  | x               |                                                               | x                                                                             |                                     |

<sup>a</sup> In addition, several countries reported challenges with participation in at least one of the following subcategories: the first survey clusters, younger age groups, men and urban (especially wealthier) areas.
